# Supplementary material
Source: HighWire-hosted journal article supplement (http://rc.rcjournal.com/highwire/filestream/21396/field_highwire_adjunct_files/1/rc-09116-Suppl-figures123.docx)

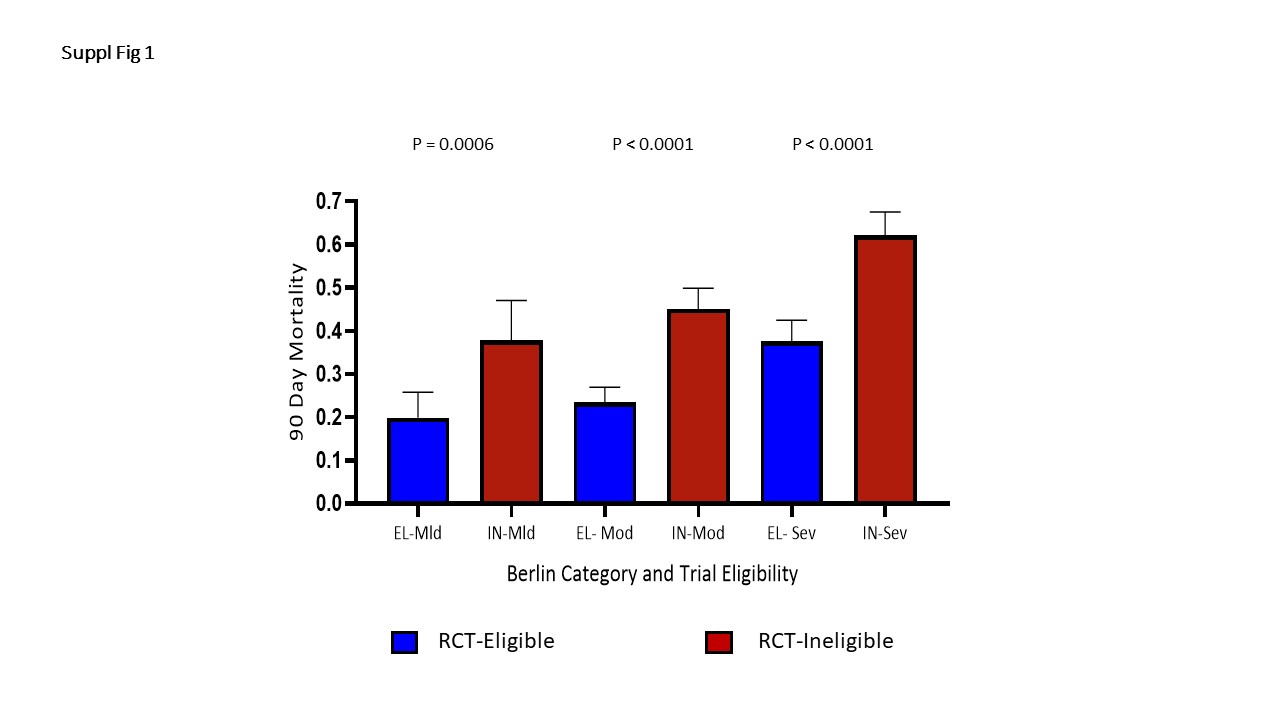


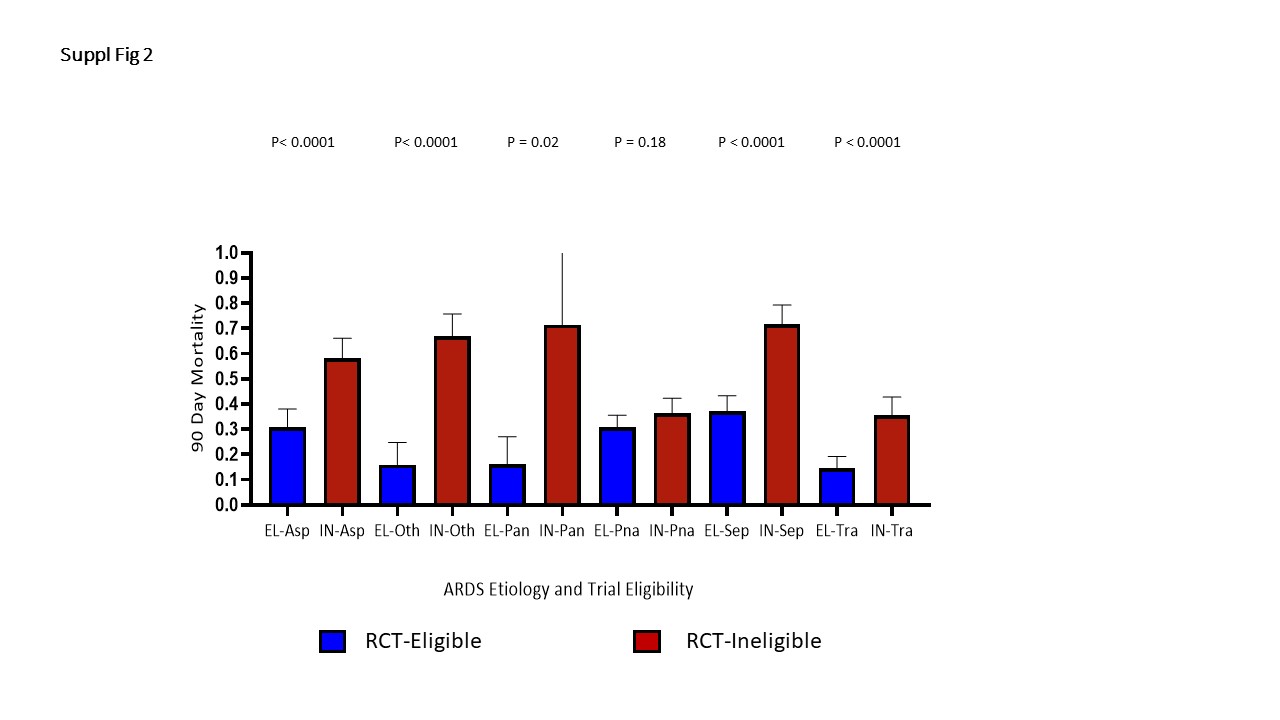


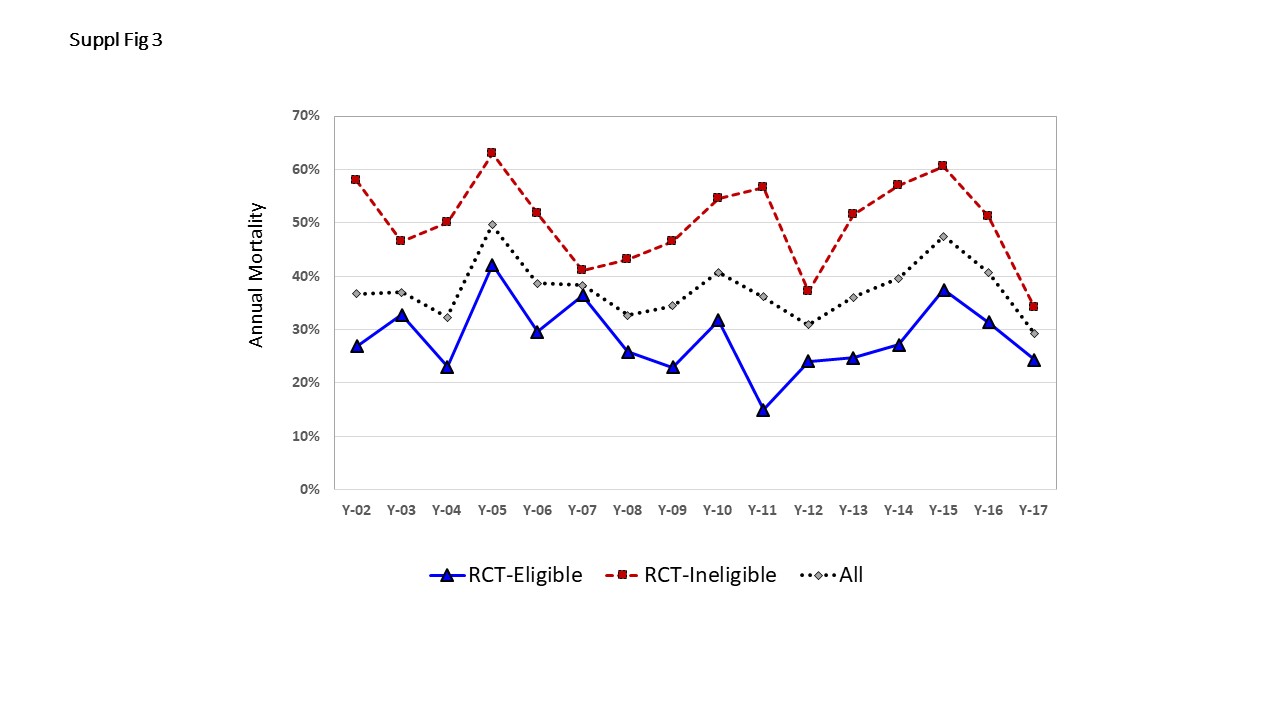

Supplement: rc-09116-Suppl-figures123.docx [file rc-09116-Suppl-figures123.docx]
